# Supplementary material for: Emergency Department Care Transitions for Patients With Cognitive Impairment: A Scoping Review
Source: PubMed Central journal article supplement — J Am Med Dir Assoc. Author manuscript; Available in PMC 2022 Aug 16. (PMC9378565; doi:10.1016/j.jamda.2022.01.076), 2022-03-02
Supplement: NIHMS1791470-supplement-1.pdf [file NIHMS1791470-supplement-1.pdf]

**Supplementary Table 1**

## All Proposed Priority Questions

- 
1. What interventions delivered to ED patients with impaired cognition improve ED to home transitions?
  2. What components of interventions delivered to ED patients with impaired cognition improve ED to home transitions.
  3. What interventions delivered to caregivers of ED patients with impaired cognition improve ED to home transitions? (or to other settings like SNF/NH/hospice)
  4. What components of interventions delivered to caregivers of ED patients with impaired cognition improve ED to home transitions.
  5. What elements of care transitions have the greatest negative impact when it comes to the care of PWD transitioning from ED to a new place (home, facility, unit)
  6. What are patient-centered metrics of quality transitions for ED patients with impaired cognition?
  7. What predicts an ED patient with impaired cognition for needing support with care transitions/having poor outcomes from care transitions?
  8. Would prioritizing ED care for patients with impaired cognition (similar to trauma/stroke) lead to a more positive transition to home (or to other settings)?
  9. What are characteristics of the care partner that enable or impede effective care transitions?
  10. What are interventions that can be applied across multiple transitions longitudinally that improve the care of PWD?
  11. How do PWD, care partners, and other stakeholders define care needs and goals specific to ED transitions?
  12. Who are the essential personnel required to optimize ED care transitions for PwD (social work, nursing, ED physician, primary care/inpatient team, care partner, others)?
  13. What decisions around care transitions should cognitively impaired patients make?
  14. How can ED providers determine if the patient has a safe living environment and, if needed, improve the living situation?
  15. What is the most effective form of follow-up for persons with dementia and at what time interval?
  16. What interventions optimize ED physician communication to inpatient and primary care providers regarding concerns related to cognition of ED patients?
-
